# Supplementary material
Source: ML conference proceedings conference paper supplement (https://openaccess.thecvf.com/content/WACV2025/html/Verma_SegDesicNet_Lightweight_Semantic_WACV_2025_paper.html)
Supplement: Supplementary file 1 [file Verma_SegDesicNet_Lightweight_Semantic_WACV_2025_supplemental.pdf]

# Supplementary Material

## SegDesicNet: Lightweight Semantic Segmentation in Remote Sensing with Geo-Coordinate Embeddings for Domain Adaptation

### A. Encoding Geographic Coordinates for Potsdam Dataset

The Potsdam dataset contains pixel height and width, rotation terms for rows and columns, and latitude and longitude of the top-left pixel for each tile of size  $6000 \times 6000$ . Because the origin is typically top-left, the pixel height is negative, and the rotation term for this data is zero here, we calculated the latitude and longitude of the top-left pixel of each image split of size  $256 \times 256$  by following algorithm 1.

---

**Algorithm 1** Calculate Geo-Coordinates of Image patch from Metadata of Image Tile

---

**Require:**  $tile_{xcoord}$ : longitude of top left pixel of given Image Tile,  $tile_{ycoord}$ : latitude of top left pixel of given Image Tile,  $pixel\_height$ ,  $pixel\_width$

- 1: **for** each Image Patch **do**
  - 2:    $i, j \leftarrow$  obtain pixel location related to Tile)
  - 3:    $patch\_longitude\_x \leftarrow x_{coord} + j \times pixel\_width$
  - 4:    $patch\_latitude\_y \leftarrow y_{coord} + i \times pixel\_height$
  - 5:   **Output:**  $\{ patch\_longitude\_x, patch\_latitude\_y \}$
  - 6: **end for**
- 

In addition, the Potsdam dataset uses the EPSG:32633 coordinate reference system (CRS), which corresponds to the WGS 84 / UTM zone 33N projection. Hence continuing with the method same as FLAIR #1, followed the following step

- Coordinate Centering,

$$\begin{aligned} C'_{lon} &= C_{lon} - 500000.0 \text{ m} \\ C'_{lat} &= C_{lat} - 4649776.22 \text{ m} \end{aligned}$$

- Transforming coordinates to the EPSG:4326 from EPSG:32633.

$$\lambda, \phi = f_{32633 \rightarrow 4326}(C'_{lon}, C'_{lat})$$

and the rest of the steps remain the same<sup>1</sup>. As per the implementation of algorithm 1, for Potsdam we have not taken the

---

<sup>1</sup>Center coordinates value (500000.0, 4649776.22) is taken from [epsg.io](http://epsg.io)

geolocation of centroid of the patch as in FLAIR#1, rather we took the coordinate of let top pixel of the patch.
